# Supplementary material for: Association of dietary tomato intake with bladder cancer risk in a prospective cohort of 101,683 individuals with 12.5 years of follow-up
Source: Aging (Albany NY). 2021 Jul 9;13(13):17629–37. doi: 10.18632/aging.203252 (PMC8312424; doi:10.18632/aging.203252)
Supplement: Supplementary Table 1 [file aging-13-203252-s002.pdf]

## SUPPLEMENTARY TABLE

**Supplementary Table 1. Association between tomato/lycopene intake and bladder cancer risk (High vs. Low).**

| <b>Variables</b>      | <b>Raw tomato</b> | <b>Tomato catsup</b> | <b>Tomato salsa</b> | <b>Tomato juice</b> | <b>Lycopene</b>  |
|-----------------------|-------------------|----------------------|---------------------|---------------------|------------------|
| Adjusted HR (95% CI)* | 1.03 (0.89-1.19)  | 1.02 (0.88-1.18)     | 0.98 (0.85-1.14)    | 0.95 (0.82-1.10)    | 0.99 (0.85-1.16) |
| p-value               | 0.653             | 0.808                | 0.812               | 0.503               | 0.941            |

HR, hazard ratio; CI, confidence interval.

\*Adjusted for age, sex, race, body mass index, education, smoking status, drinking status, total energy intake, randomization arm, family history of any cancer and marital status.
